# Supplementary material for: A new zeolitic lithium aluminum imidazolate framework
Source: Royal Society of Chemistry journal article supplement (doi:10.1039/d1dt01017d), 2021-01-01
Supplement: d1dt01017d1.pdf [file d1dt01017d1.pdf]

## A New Zeolitic Lithium Aluminum Imidazolate Framework

*Guangshen Jiang<sup>a,b</sup>, Volodymyr Bon<sup>b</sup>, Fei Xu<sup>a,b\*</sup>, Bikash Garai<sup>b</sup>, En Zhang<sup>b</sup>, Irena Senkowska<sup>b</sup>, Stephanie Poetke<sup>c</sup>, Felix Hippauf<sup>c</sup>, Steffen Hausdorf<sup>b</sup>, Silvia Paasch<sup>d</sup>, Eike Brunner<sup>d</sup>, Hongqiang Wang<sup>a\*</sup>, Stefan Kaskel<sup>b,c\*</sup>*

<sup>a</sup> State Key Laboratory of Solidification Processing, Center for Nano Energy Materials, School of Materials Science and Engineering, Northwestern Polytechnical University, Shaanxi Joint Laboratory of Graphene (NPU), Xi'an 710072, P. R. China.

E-mail: feixu@nwpu.edu.cn; hongqiang.wang@nwpu.edu.cn;

<sup>b</sup> Department of Inorganic Chemistry, Technische Universität Dresden, Bergstrasse 66, 01062 Dresden, Germany

E-mail: stefan.kaskel@tu-dresden.de

<sup>c</sup> Fraunhofer Institute for Material and Beam Technology (IWS) Winterbergstr, 28, Dresden 01277, Germany

<sup>d</sup> Department of Bioanalytical Chemistry, Technische Universität Dresden, Bergstrasse 66, 01062 Dresden, Germany

# 1 Experimental

## 1.1 DUT-174 synthesis

LiAlH<sub>4</sub> (1 mL 2M THF solution) and 2-methylimidazole (660 mg) was diluted and dissolved in 20 mL and 30 mL tetrahydrofuran (THF), respectively. The LiAlH<sub>4</sub> solution was syringed into of 2-methylimidazole solution in 2 hours at 0 °C. The white precipitate was generated with H<sub>2</sub> released and then was stirred for another 18 h at 25 °C. The whole operations were carried out at Schlenk line under Ar atmosphere. The product was filtered under Ar atmosphere and the obtained filter cake is heated at 120 °C for 16 h under dynamic vacuum conditions.

## 1.2 Characterization

X-ray diffraction (XRD) patterns were collected by capillary tube on STOE STADI MP diffractometer (Cu K $\alpha$  radiation, 0.15406 nm). The porosity was determined using N<sub>2</sub> and CO<sub>2</sub> adsorption/desorption at 77 K and 195K, respectively, test using ASiQwin (Quantachrome) instrument. Brunauer-Emmett-Teller (BET) theory was employed to calculate specific surface area. The pore distribution was analyzed based on NLDFT model. Fourier-transform infrared spectroscopy (FTIR) data was collected on a Bruker VERTEX 70. All solid-state NMR spectra were measured on a BRUKER Ascend 300 MHz spectrometer using a commercial 2.5 mm MAS NMR probe and a MAS frequency of 15 kHz. Following resonance frequencies were used: 75.5 MHz for <sup>13</sup>C CP NMR spectrum, 78.2 MHz for <sup>27</sup>Al NMR spectrum, 116.6 MHz for <sup>7</sup>Li NMR spectrum, and 300.1 MHz for <sup>1</sup>H NMR spectrum. Inductively coupled plasma optical emission spectrometer (ICP-OES) was conducted on ICP OES Optima 7000DV from Perkin Elmer with S10 Autosampler. Thermogravimetric analysis (TGA) was conducted on NETZSCH STA 409PC/PG from room temperature to 800 °C with Ar flow rate of 100 ml min<sup>-1</sup> at 10 °C min<sup>-1</sup>. Element analysis was carried out on the EURO EA Elemental

Analyzer from EuroVector. The geometrical surface area, accessible pore volume and pore size distribution were calculated using Zeo++ software using the default settings<sup>1</sup>.

### 1.3 Rietveld refinement of DUT-174 structure

The crystal structure of DUT-174 was refined using Rietveld method<sup>2</sup>. The structural model was built in visualization module of Materials Studio 5.0 software using ZIF-8 structure as initial model. The symmetry of the original structure was reduced to P23 in order to get two independent atoms in the structure. The Thompson-Cox-Hastings function with axial divergence was used in the Pawley fit of PXRD patterns. The Rietveld refinement with energy contribution of 1% (based on integrated UFF module) was performed using rigid-body refinement with metal ions, imidazole rings and methyl groups, refined as the separate units. This results in the refinement of 6 motion groups with 26 degrees of freedom. The Rietveld plot is given in Figure S1.

Structural data for DUT-174:  $C_{16}H_{20}N_8AlLi$ ,  $M = 358.32 \text{ g mol}^{-1}$ , cubic,  $P23$  ( $No$  195),  $a = 16.83041(3) \text{ \AA}$ ,  $V = 4767.42(5) \text{ \AA}^3$ ,  $Z = 6$ ; Profile function: Thompson-Cox-Hastings,  $U = 0.13036$ ,  $V = 0.00211$ ,  $W = 0.00251$ ,  $X = 0.08921$ ,  $Y = 0.18169$ ; Asymmetry correction function: Berar-Baldinozzi  $P_1 = -0.08303$ ,  $P_2 = -0.01204$ ,  $P_3 = -0.00019$ ,  $P_4 = 0.00000$ ; Global isotropic temperature factor  $U = 0.07817$ ; Refined Motion Groups 6, refined degree of freedom 26;  $R_w = 2.63\%$ ,  $R_p = 1.86\%$ .

### 1.4 Electrochemical test

100 mg DUT-174 were distributed homogeneously in the test cell and compressed into a pellet at 300 Mpa. The pellet was assembled in Swagelok-type symmetrical cell with lithium plates as electrodes. The test cell was closed with a torque screw at 3.5 Nm (corresponding to ~20 MPa). The solvent mixture ethylene carbonate/dimethyl carbonate (50:50 EC/DMC, 1.05×pore volume of DUT-174) was added into DUT-174 solid-state electrolyte and mixed thoroughly in a mortar before assembling the test cells. The current response was recorded under constant voltage at different 0.1, 1.0, 9.0 or 10 V using a VMP-300 (Bio-logic, France).

## 2. Supporting figures

**Table S1** Synthesis conditions and sample name of DUT-174

| Synthesis conditions                                                                          |                                                | DUT-174 sample name  |
|-----------------------------------------------------------------------------------------------|------------------------------------------------|----------------------|
| Effect of LiAlH <sub>4</sub><br>Addition time<br><b>(Fig. S1a)</b>                            | 5 min                                          | 5min                 |
|                                                                                               | 2 h                                            | 2 h                  |
| Effect of solvent<br><b>(Fig. S1b)</b>                                                        | DOL                                            | DOL                  |
|                                                                                               | DME                                            | DME                  |
|                                                                                               | THF+DME                                        | THF+DME              |
|                                                                                               | THF                                            | THF                  |
| Effects of Reaction at low<br>temperature and solvothermal<br><b>(Fig. S1c)</b>               | Reaction at -196 °C                            | -196 °C              |
|                                                                                               | Reaction at -196 °C+<br>solvothermal at 150°C  | -196 °C Solvothermal |
| Effect of reaction temperature<br><b>(Fig. S1d)</b>                                           | 25 °C                                          | 25 °C                |
|                                                                                               | 50 °C                                          | 50 °C                |
|                                                                                               | 75 °C                                          | 75 °C                |
| Effects of Triethylamine (TEA)<br>additive +<br>solvothermal temperature<br><b>(Fig. S1e)</b> | No TEA+120 °C<br>(Solvothermal<br>temperature) | 120 °C               |
|                                                                                               | TEA+120 °C(Solvothermal<br>temperature)        | TEA+120 °C           |
|                                                                                               | TEA+150 °C<br>(Solvothermal<br>temperature)    | TEA+150 °C           |

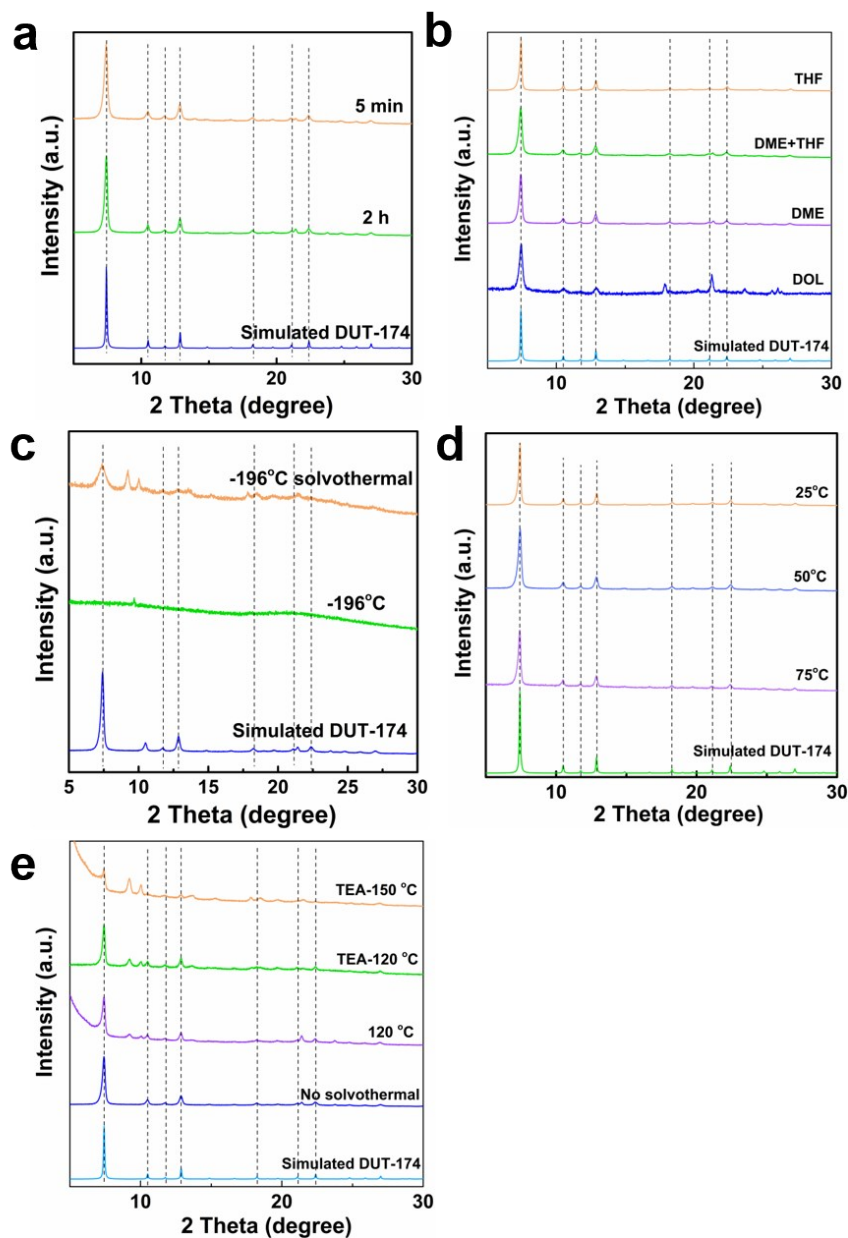

**Fig. S1** a) Effect of addition time of  $\text{LiAlH}_4$  solution into 2-methylimidazole, b) solvent effect, c) and d) effect of reaction temperature on the formation of DUT-174, e) effects of TEA additive and solvothermal on the formation of DUT-174 (THF: Tetrahydrofuran, DME: 1,2-Dimethoxyethane, DOL: 1,3-Dioxolane, TEA: triethylamine).

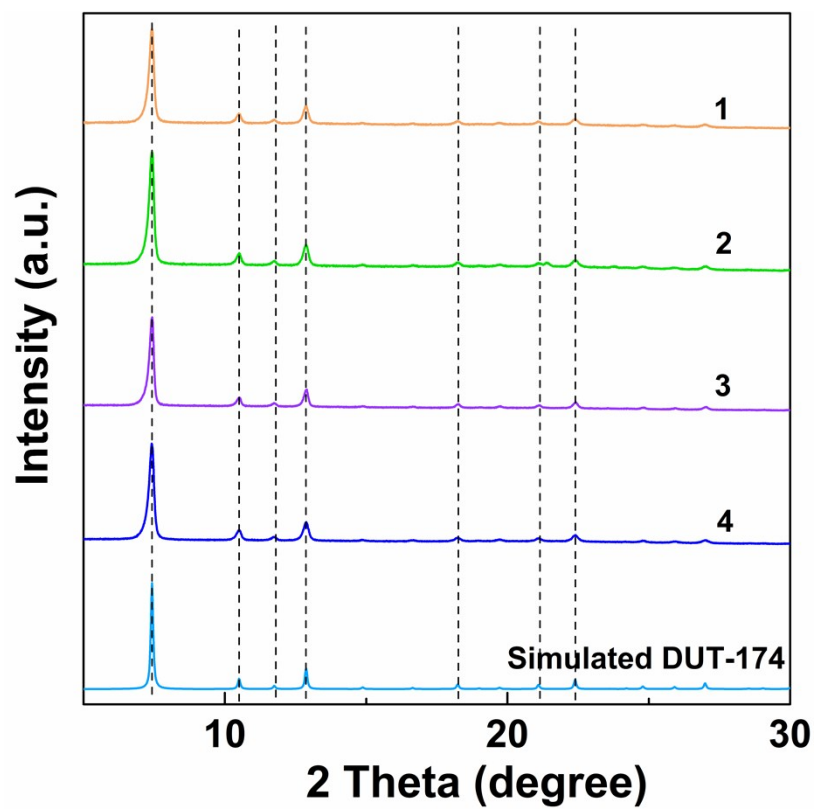

**Fig. S2** XRD patterns of four DUT-174 samples all synthesized at 25 °C and activated 120 °C.

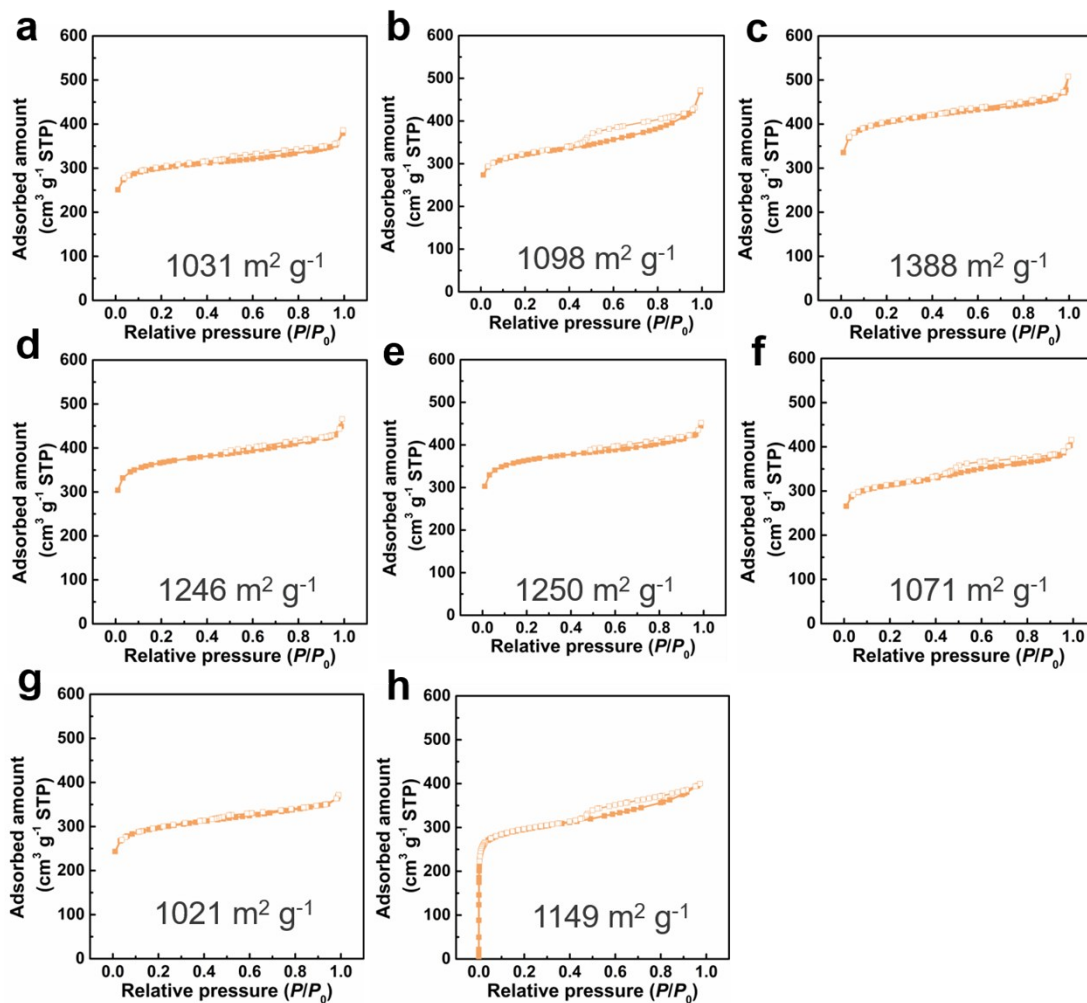

**Fig. S3** N<sub>2</sub> adsorption/desorption isotherms of DUT-174 samples all synthesized at 25 °C and activated 120 °C. Note: a)-g) p/p<sub>0</sub> tested from 10<sup>-2</sup>~1; g) p/p<sub>0</sub> tested from 10<sup>-6</sup>~1

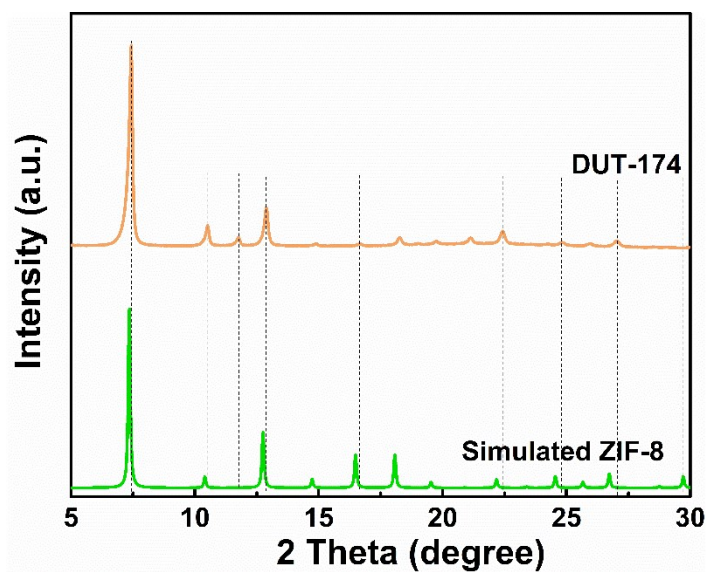

**Fig. S4** Comparison of XRD patterns between DUT-174 with simulated ZIF-8.

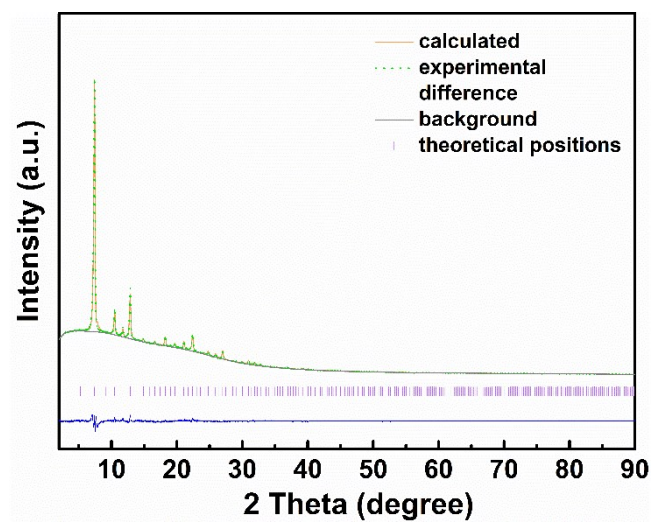

Fig. S5 Rietveld plot for DUT-174.

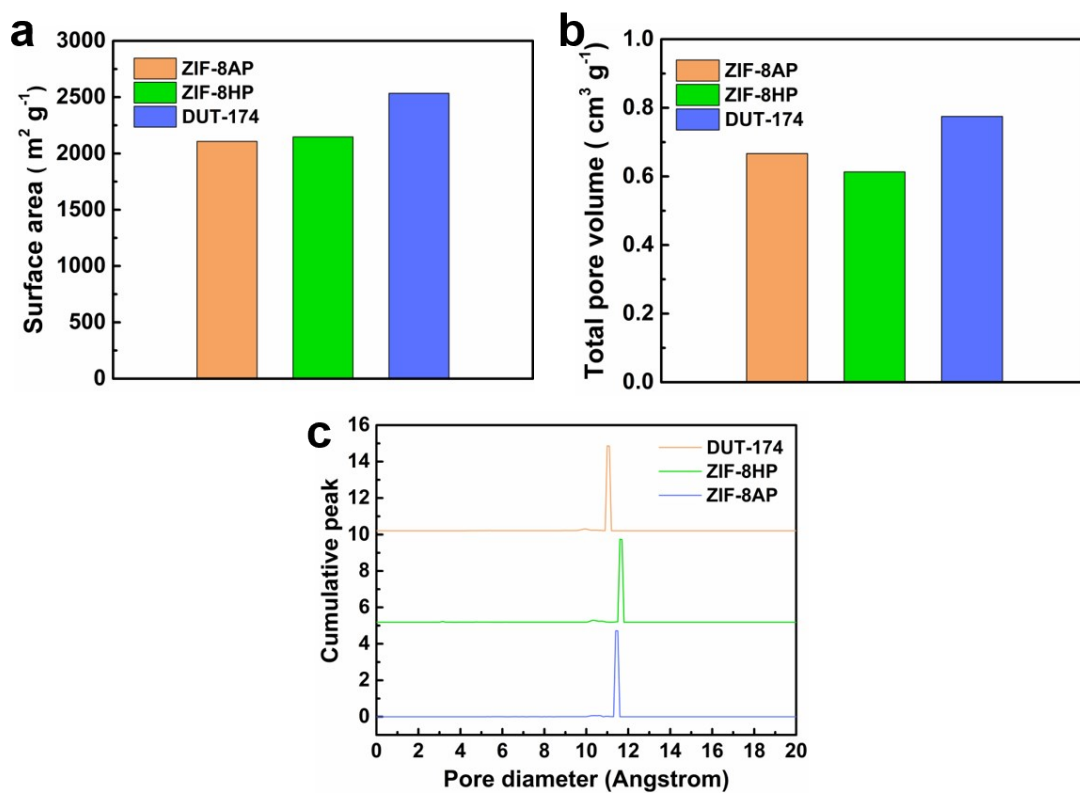

Fig. S6 a) Geometric surface area, b) total pore volume and c) pore size distribution for DUT-174, ZIF-8AP and ZIF-8HP.



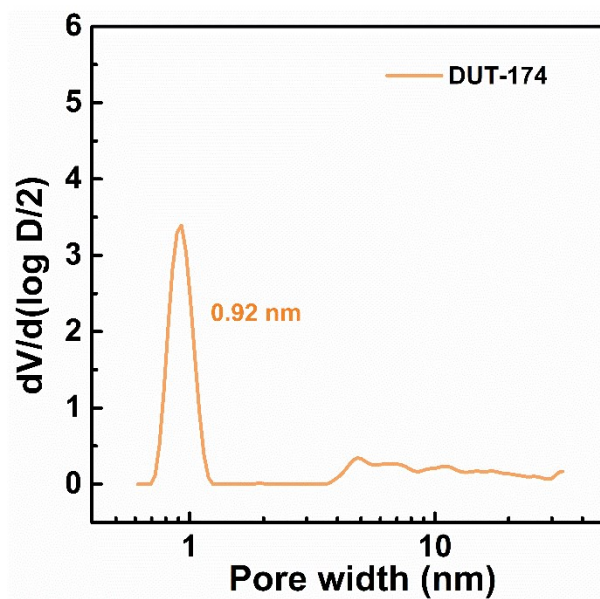

**Fig. S7** Pore distribution of DUT-174 calculated by N<sub>2</sub> adsorption/desorption test.

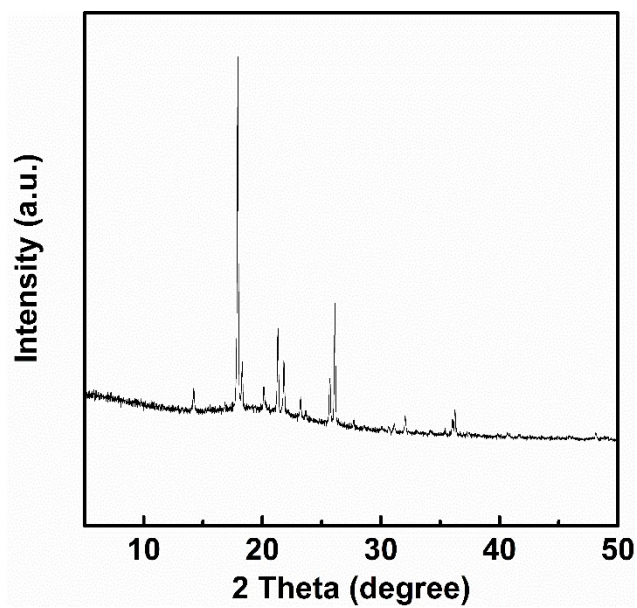

**Fig. S8** XRD pattern of DUT-174 upon exposure to moisture.

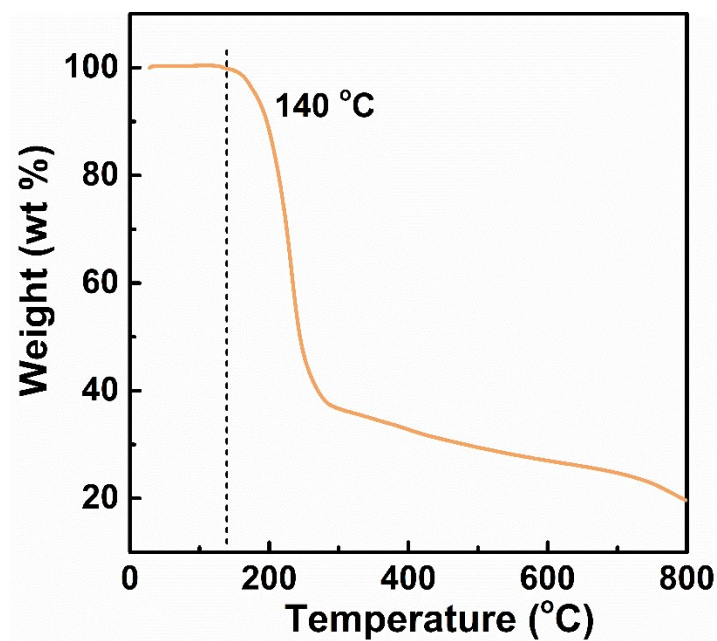

Fig. S9 TG curve of DUT-174 at 10 °C min<sup>-1</sup> in Ar atmosphere.

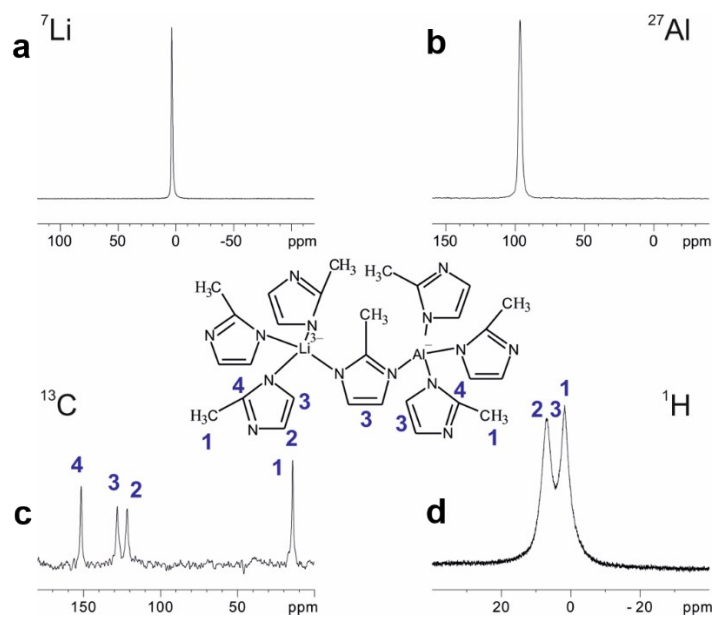

Fig. S10 ssNMR spectra of a) <sup>7</sup>Li, b) <sup>27</sup>Al, c) <sup>13</sup>C and d) <sup>1</sup>H in DUT-174.

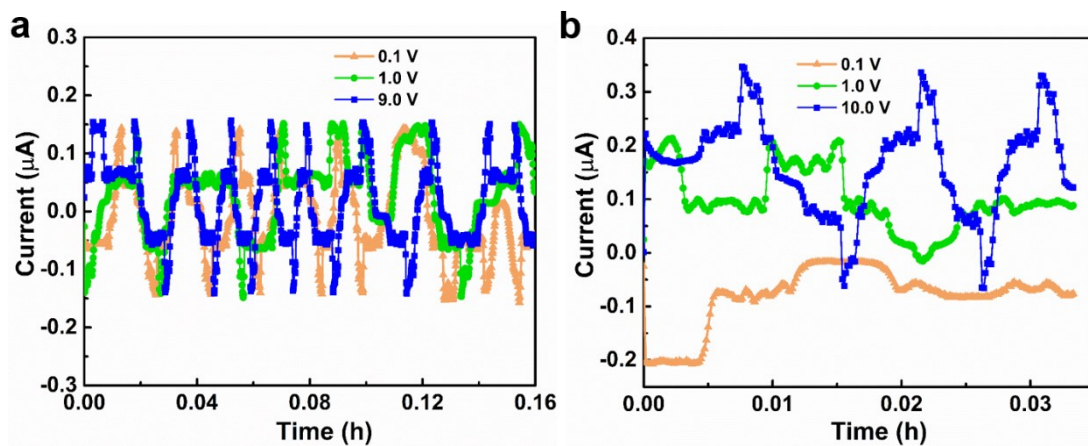

**Fig. S11** Current response of DUT-174 as solid-state electrolyte a) without and b) with the addition of EC/DMC.

### 3. Supporting references

1. M. Pinheiro, R. L. Martin, C. H. Rycroft and M. Haranczyk, *Cryst. Eng. Comm.*, 2013, **15**, 7531-7538.
2. H. M. Rietveld, *J. Appl. Crystallogr.*, 1969, **2**, 65-71.
